# Supplementary material for: Estimating the Routing Parameter of the Xin’anjiang Hydrological Model Based on Remote Sensing Data and Machine Learning
Source: MDPI journal article supplement (doi:10.3390/rs14184609), 2022-09-15
Supplement: s1 [file s1]

### Details of CAMELS catchments used for this study

| USGS Gauge<br>ID | Name                                         | Drainage<br>Area | Simulation<br>Period | Year<br>for<br>Calibration | Year<br>for<br>Validation |
|------------------|----------------------------------------------|------------------|----------------------|----------------------------|---------------------------|
| 01591400         | CATTAIL CREEK NEAR GLENWOOD, MD              | 59.61            | 1981-2000            | 13                         | 7                         |
| 01658500         | S F QUANTICO CREEK NEAR INDEPENDENT HILL, VA | 23.69            | 1981-2000            | 13                         | 7                         |
| 01669000         | PISCATAWAY CREEK NEAR TAPPAHANNOCK, VA       | 75.31            | 1981-2000            | 13                         | 7                         |
| 01669520         | DRAGON SWAMP AT MASCOT, VA                   | 277.68           | 1982-2000            | 13                         | 6                         |
| 02038850         | HOLIDAY CREEK NEAR ANDERSONVILLE, VA         | 23.8             | 1981-2000            | 13                         | 7                         |
| 02046000         | STONY CREEK NEAR DINWIDDIE, VA               | 290.88           | 1981-2000            | 13                         | 7                         |
| 02051000         | NORTH MEHERRIN RIVER NEAR LUNENBURG, VA      | 145.1            | 1981-2000            | 13                         | 7                         |
| 02051500         | MEHERRIN RIVER NEAR LAWRENCEVILLE, VA        | 1432.41          | 1981-2000            | 13                         | 7                         |
| 02056900         | BLACKWATER RIVER NEAR ROCKY MOUNT, VA        | 299.46           | 1981-2000            | 13                         | 7                         |
| 02059500         | GOOSE CREEK NEAR HUDDLESTON, VA              | 486.46           | 1981-2000            | 13                         | 7                         |
| 02064000         | FALLING RIVER NEAR NARUNA, VA                | 427.98           | 1981-2000            | 13                         | 7                         |
| 02065500         | CUB CREEK AT PHENIX, VA                      | 252.75           | 1981-2000            | 13                         | 7                         |
| 02069700         | SOUTH MAYO RIVER NEAR NETTLERIDGE, VA        | 228.68           | 1981-2000            | 13                         | 7                         |
| 02070000         | NORTH MAYO RIVER NEAR SPENCER, VA            | 279.27           | 1981-2000            | 13                         | 7                         |
| 02074500         | SANDY RIVER NEAR DANVILLE, VA                | 288.79           | 1981-2000            | 13                         | 7                         |
| 02077200         | HYCO CREEK NEAR LEASBURG, NC                 | 126.34           | 1981-2000            | 13                         | 7                         |
| 02081500         | TAR RIVER NEAR TAR RIVER, NC                 | 432.82           | 1981-2000            | 13                         | 7                         |
| 02082950         | LITTLE FISHING CREEK NEAR WHITE OAK, NC      | 461.92           | 1981-2000            | 13                         | 7                         |
| 02092500         | TRENT RIVER NEAR TRENTON, NC                 | 435.17           | 1981-2000            | 13                         | 7                         |
| 02096846         | CANE CREEK NEAR ORANGE GROVE, NC             | 19.58            | 1990-2000            | 7                          | 4                         |

|          |                                                  |         |           |    |   |
|----------|--------------------------------------------------|---------|-----------|----|---|
| 02102908 | FLAT CREEK NEAR INVERNESS, NC                    | 20.06   | 1981-2000 | 13 | 7 |
| 02108000 | NORTHEAST CAPE FEAR RIVER NEAR CHINQUAPIN,<br>NC | 1550.74 | 1981-2000 | 13 | 7 |
| 02111180 | ELK CREEK AT ELKVILLE, NC                        | 130.87  | 1981-2000 | 13 | 7 |
| 02111500 | REDDIES RIVER AT NORTH WILKESBORO, NC            | 233.35  | 1981-2000 | 13 | 7 |
| 02112120 | ROARING RIVER NEAR ROARING RIVER, NC             | 329.79  | 1981-2000 | 13 | 7 |
| 02112360 | MITCHELL RIVER NEAR STATE ROAD, NC               | 206.82  | 1981-2000 | 13 | 7 |
| 02118500 | HUNTING CREEK NEAR HARMONY, NC                   | 400.53  | 1981-2000 | 13 | 7 |
| 02125000 | BIG BEAR CR NR RICHFIELD, NC                     | 145.07  | 1981-2000 | 13 | 7 |
| 02128000 | LITTLE RIVER NEAR STAR, NC                       | 271.99  | 1981-2000 | 13 | 7 |
| 02137727 | CATAWBA R NR PLEASANT GARDENS, NC                | 329.3   | 1982-2000 | 13 | 6 |
| 02140991 | JOHNS RIVER AT ARNEYS STORE, NC                  | 522.11  | 1986-2000 | 10 | 5 |
| 02143000 | HENRY FORK NEAR HENRY RIVER, NC                  | 222.1   | 1981-2000 | 13 | 7 |
| 02143040 | JACOB FORK AT RAMSEY, NC                         | 68.19   | 1981-2000 | 13 | 7 |
| 02149000 | COVE CREEK NEAR LAKE LURE, NC                    | 203.73  | 1981-2000 | 13 | 7 |
| 02152100 | FIRST BROAD RIVER NEAR CASAR, NC                 | 156.68  | 1981-2000 | 13 | 7 |
| 02177000 | CHATTOOGA RIVER NEAR CLAYTON, GA                 | 527.23  | 1981-2000 | 13 | 7 |
| 02178400 | TALLULAH RIVER NEAR CLAYTON, GA                  | 152.12  | 1981-2000 | 13 | 7 |
| 02193340 | KETTLE CREEK NEAR WASHINGTON, GA                 | 89.61   | 1987-2000 | 9  | 5 |
| 02196000 | STEVENS CREEK NEAR MODOC, SC                     | 1408.7  | 1982-2000 | 13 | 6 |
| 02198100 | BEAVERDAM CREEK NEAR SARDIS, GA                  | 79.75   | 1987-2000 | 9  | 5 |
| 02202600 | BLACK CREEK NEAR BLITCHTON, GA                   | 623.34  | 1981-2000 | 13 | 7 |
| 02212600 | FALLING CREEK NEAR JULIETTE, GA                  | 189.79  | 1981-2000 | 13 | 7 |
| 02215100 | TUCSAWHATCHEE CREEK NEAR HAWKINSVILLE, GA        | 425.51  | 1987-2000 | 9  | 5 |
| 02216180 | TURNPIKE CREEK NEAR MCRAE, GA                    | 128.08  | 1984-2000 | 11 | 6 |
| 02221525 | MURDER CREEK BELOW EATONTON, GA                  | 493.28  | 1981-2000 | 13 | 7 |

|          |                                                  |         |           |    |   |
|----------|--------------------------------------------------|---------|-----------|----|---|
| 02342933 | SOUTH FORK COWIKEE CREEK NEAR BATESVILLE AL      | 290.04  | 1981-2000 | 13 | 7 |
| 02349900 | TURKEY CREEK AT BYROMVILLE, GA                   | 124.29  | 1981-2000 | 13 | 7 |
| 02350900 | KINCHAFOONEE CREEK NEAR DAWSON, GA               | 1365.59 | 1986-2000 | 10 | 5 |
| 02361000 | CHOCTAWHATCHEE RIVER NEAR NEWTON, AL.            | 1779.3  | 1981-2000 | 13 | 7 |
| 02363000 | PEA RIVER NEAR ARITON AL                         | 1292.62 | 1989-2000 | 8  | 4 |
| 02369800 | BLACKWATER RIVER NEAR BRADLEY AL                 | 231.14  | 1981-2000 | 13 | 7 |
| 02371500 | CONECUH RIVER AT BRANTLEY AL                     | 1257.42 | 1981-2000 | 13 | 7 |
| 02372250 | PATSALIGA CREEK NEAR BRANTLEY AL                 | 1145.56 | 1981-2000 | 13 | 7 |
| 02374500 | MURDER CREEK NEAR EVERGREEN AL                   | 458.23  | 1981-2000 | 13 | 7 |
| 02381600 | FAUSETT CREEK NEAR TALKING ROCK, GA              | 10.33   | 1981-2000 | 13 | 7 |
| 02384540 | MILL CREEK NEAR CRANDALL, GA                     | 22.13   | 1986-2000 | 10 | 5 |
| 02395120 | TWO RUN CREEK NEAR KINGSTON, GA                  | 85.27   | 1981-2000 | 13 | 7 |
| 02408540 | HATCHET CREEK BELOW ROCKFORD AL                  | 683.86  | 1981-2000 | 13 | 7 |
| 02415000 | HILLABEE CREEK NEAR HACKNEYVILLE AL              | 491.75  | 1987-2000 | 9  | 5 |
| 02422500 | MULBERRY CREEK AT JONES AL                       | 599.95  | 1981-2000 | 13 | 7 |
| 02427250 | PINE BARREN CREEK NEAR SNOW HILL, AL.            | 680.64  | 1990-2000 | 7  | 4 |
| 02430085 | RED BUD CREEK NR MOORES MILL, MS                 | 40.73   | 1981-2000 | 13 | 7 |
| 02430615 | MUD CREEK NR FAIRVIEW, MS                        | 32.52   | 1981-2000 | 13 | 7 |
| 02450250 | SIPSEY FORK NEAR GRAYSON AL                      | 242.69  | 1981-2000 | 13 | 7 |
| 02464000 | NORTH RIVER NEAR SAMANTHA AL                     | 581.79  | 1981-2000 | 13 | 7 |
| 02464146 | TURKEY CREEK NEAR TUSCALOOSA                     | 15.84   | 1982-2000 | 13 | 6 |
| 02464360 | BINION CREEK BELOW GIN CREEK NEAR SAMANTHA<br>AL | 148.99  | 1988-2000 | 8  | 5 |
| 02465493 | ELLIOTTS CREEK AT MOUNDVILLE AL                  | 86.62   | 1981-2000 | 13 | 7 |
| 02469800 | SATILPA CREEK NEAR COFFEEVILLE AL                | 422.88  | 1981-2000 | 13 | 7 |
| 02472000 | LEAF RIVER NR COLLINS, MS                        | 1927.67 | 1981-2000 | 13 | 7 |

|          |                                              |         |           |    |   |
|----------|----------------------------------------------|---------|-----------|----|---|
| 02472500 | BOUIE CREEK NR HATTIESBURG, MS               | 789.45  | 1991-2000 | 7  | 3 |
| 03140000 | Mill Creek near Coshocton OH                 | 71.31   | 1981-2000 | 13 | 7 |
| 03280700 | CUTSHIN CREEK AT WOOTON, KY                  | 158.56  | 1981-2000 | 13 | 7 |
| 03281100 | GOOSE CREEK AT MANCHESTER, KY                | 425.25  | 1981-2000 | 13 | 7 |
| 03281500 | SOUTH FORK KENTUCKY RIVER AT BOONEVILLE, KY  | 1836.71 | 1981-2000 | 13 | 7 |
| 03285000 | DIX RIVER NEAR DANVILLE, KY                  | 823.29  | 1981-2000 | 13 | 7 |
| 03338780 | NORTH FORK VERMILION RIVER NEAR BISMARCK, IL | 691.76  | 1990-2000 | 7  | 4 |
| 03340800 | BIG RACCOON CREEK NEAR FINCASTLE IND         | 363.41  | 1981-2000 | 13 | 7 |
| 03346000 | NORTH FORK EMBARRAS RIVER NEAR OBLONG, IL    | 828.74  | 1981-2000 | 13 | 7 |
| 03357350 | PLUM CREEK NEAR BAINBRIDGE, IND.             | 26.11   | 1981-2000 | 13 | 7 |
| 03364500 | CLIFTY CREEK AT HARTSVILLE, IN               | 242.41  | 1981-2000 | 13 | 7 |
| 03384450 | LUSK CREEK NEAR EDDYVILLE, IL                | 112.28  | 1981-2000 | 13 | 7 |
| 03460000 | CATALOOCHEE CREEK NEAR CATALOOCHEE, NC       | 127.62  | 1981-2000 | 13 | 7 |
| 03498500 | LITTLE RIVER NEAR MARYVILLE, TN              | 700.35  | 1981-2000 | 13 | 7 |
| 03500000 | LITTLE TENNESSEE RIVER NEAR PRENTISS, NC     | 362.46  | 1981-2000 | 13 | 7 |
| 03500240 | CARTOOGECHAYE CREEK NEAR FRANKLIN, NC        | 148.94  | 1981-2000 | 13 | 7 |
| 03504000 | NANTAHALA RIVER NEAR RAINBOW SPRINGS, NC     | 134.56  | 1981-2000 | 13 | 7 |
| 03574500 | PAINT ROCK RIVER NEAR WOODVILLE AL           | 859.22  | 1981-2000 | 13 | 7 |
| 03592718 | LITTLE YELLOW CREEK EAST NR BURNSVILLE, MS   | 67      | 1981-2000 | 13 | 7 |
| 03604000 | BUFFALO RIVER NEAR FLAT WOODS, TN            | 1163.35 | 1981-2000 | 13 | 7 |
| 05495000 | Fox River at Wayland, MO                     | 1029.86 | 1981-2000 | 13 | 7 |
| 05495500 | BEAR CREEK NEAR MARCELLINE, IL               | 885.73  | 1981-2000 | 13 | 7 |
| 05501000 | North River at Palmyra, MO                   | 929.86  | 1981-2000 | 13 | 7 |
| 05503800 | Crooked Creek near Paris, MO                 | 212.69  | 1981-2000 | 13 | 7 |
| 05507600 | Lick Creek at Perry, MO                      | 275.86  | 1981-2000 | 13 | 7 |
| 05508805 | Spencer Cr. bl Plum Cr. nr Frankford, MO     | 536.51  | 1981-2000 | 13 | 7 |

|          |                                          |         |           |    |   |
|----------|------------------------------------------|---------|-----------|----|---|
| 05514500 | CUIVRE RIVER NEAR TROY, MO               | 2410.51 | 1981-2000 | 13 | 7 |
| 05525500 | SUGAR CREEK AT MILFORD, IL               | 1158.24 | 1981-2000 | 13 | 7 |
| 05584500 | LA MOINE RIVER AT COLMAR, IL             | 1711.89 | 1981-2000 | 13 | 7 |
| 05585000 | LA MOINE RIVER AT RIPLEY, IL             | 3371.38 | 1981-2000 | 13 | 7 |
| 05591550 | WHITLEY CREEK NEAR ALLENVILLE, IL        | 97.12   | 1981-2000 | 13 | 7 |
| 05592050 | ROBINSON CREEK NEAR SHELBYVILLE, IL      | 260.92  | 1981-2000 | 13 | 7 |
| 05592575 | HICKORY CREEK NEAR BROWNSTOWN, IL        | 116.33  | 1990-2000 | 7  | 4 |
| 05593575 | LITTLE CROOKED CREEK NEAR NEW MINDEN, IL | 220.52  | 1981-2000 | 13 | 7 |
| 05593900 | EAST FORK SHOAL CREEK NEAR COFFEEN, IL   | 145.69  | 1981-2000 | 13 | 7 |
| 05595730 | RAYSE CREEK NEAR WALTONVILLE, IL         | 233.33  | 1981-2000 | 13 | 7 |
| 06888500 | MILL C NR PAXICO, KS                     | 842.52  | 1981-2000 | 13 | 7 |
| 06889200 | SOLDIER C NR DELIA, KS                   | 406.48  | 1981-2000 | 13 | 7 |
| 06889500 | SOLDIER C NR TOPEKA, KS                  | 766.03  | 1981-2000 | 13 | 7 |
| 06892000 | STRANGER C NR TONGANOXIE, KS             | 1091.6  | 1981-2000 | 13 | 7 |
| 06906800 | Lamine River near Otterville, MO         | 1411.96 | 1988-2000 | 8  | 5 |
| 06910800 | MARAIS DES CYGNES R NR READING, KS       | 444.58  | 1981-2000 | 13 | 7 |
| 06911900 | DRAGOON C NR BURLINGAME, KS              | 291.33  | 1981-2000 | 13 | 7 |
| 06917000 | L OSAGE R AT FULTON, KS                  | 767.5   | 1981-2000 | 13 | 7 |
| 06918460 | Turnback Creek above Greenfield, MO      | 650.76  | 1981-2000 | 13 | 7 |
| 06919500 | Cedar Creek near Pleasant View, MO       | 1069.85 | 1981-2000 | 13 | 7 |
| 06921070 | Pomme de Terre River near Polk, MO       | 716.88  | 1981-2000 | 13 | 7 |
| 06921200 | Lindley Creek near Polk, MO              | 328.76  | 1981-2000 | 13 | 7 |
| 06934000 | Gasconade River near Rich Fountain, MO   | 8267.52 | 1988-2000 | 8  | 5 |
| 07014500 | Meramec River near Sullivan, MO          | 3851.18 | 1981-2000 | 13 | 7 |
| 07056000 | Buffalo River near St. Joe, AR           | 2147.73 | 1981-2000 | 13 | 7 |
| 07057500 | North Fork River near Tecumseh, MO       | 1456.46 | 1981-2000 | 13 | 7 |

|          |                                         |         |           |    |   |
|----------|-----------------------------------------|---------|-----------|----|---|
| 07060710 | North Sylamore Creek near Fifty Six, AR | 152.36  | 1981-2000 | 13 | 7 |
| 07066000 | Jacks Fork at Eminence, MO              | 1050.66 | 1981-2000 | 13 | 7 |
| 07067000 | Current River at Van Buren, MO          | 4315.66 | 1981-2000 | 13 | 7 |
| 07068000 | Current River at Doniphan, MO           | 5312.93 | 1981-2000 | 13 | 7 |
| 07071500 | Eleven Point River near Bardley, MO     | 2030.3  | 1981-2000 | 13 | 7 |
| 07149000 | MEDICINE LODGE R NR KIOWA, KS           | 2263.93 | 1981-2000 | 13 | 7 |
| 07167500 | OTTER C AT CLIMAX, KS                   | 321.12  | 1981-2000 | 13 | 7 |
| 07180500 | CEDAR C NR CEDAR POINT, KS              | 275.78  | 1981-2000 | 13 | 7 |
| 07184000 | LIGHTNING C NR MCCUNE, KS               | 514.82  | 1981-2000 | 13 | 7 |
| 07195800 | Flint Creek at Springtown, AR           | 38.58   | 1981-2000 | 13 | 7 |
| 07196900 | Baron Fork at Dutch Mills, AR           | 106.55  | 1982-2000 | 13 | 6 |
| 07197000 | Baron Fork at Eldon, OK                 | 807.51  | 1981-2000 | 13 | 7 |
| 07261000 | Cadron Creek near Guy, AR               | 455.94  | 1981-2000 | 13 | 7 |
| 07263295 | Maumelle River at Williams Junction, AR | 119.08  | 1990-2000 | 7  | 4 |
| 07290650 | BAYOU PIERRE NR WILLOWS, MS             | 1694.61 | 1981-2000 | 13 | 7 |
| 07291000 | HOMOCHITTO RIVER AT EDDICETON, MS       | 482.23  | 1981-2000 | 13 | 7 |
| 07292500 | HOMOCHITTO RIVER AT ROSETTA, MS         | 2076.55 | 1981-2000 | 13 | 7 |
| 07295000 | BUFFALO RIVER NR WOODVILLE, MS          | 466.88  | 1981-2000 | 13 | 7 |
| 07315200 | E Fk Little Wichita Rv nr Henrietta, TX | 502.7   | 1981-2000 | 13 | 7 |
| 07315700 | Mud Creek near Courtney, OK             | 1491.41 | 1981-2000 | 13 | 7 |
| 07335700 | Kiamichi River near Big Cedar, OK       | 104.13  | 1981-2000 | 13 | 7 |
| 07340300 | Cossatot River near Vandervoort, AR     | 252.13  | 1981-2000 | 13 | 7 |
| 07346045 | Black Cypress Bayou at Jefferson, TX    | 963.16  | 1981-2000 | 13 | 7 |
| 07359610 | Caddo River near Caddo Gap, AR          | 342.43  | 1990-2000 | 7  | 4 |
| 07362100 | SMACKOVER CREEK NEAR SMACKOVER, ARK.    | 996.74  | 1981-2000 | 13 | 7 |
| 07362587 | Alum Fork Saline River near Reform, AR  | 70.92   | 1990-2000 | 7  | 4 |

|          |                                       |         |           |    |   |
|----------|---------------------------------------|---------|-----------|----|---|
| 07373000 | Big Creek at Pollock, LA              | 134.29  | 1981-2000 | 13 | 7 |
| 07375000 | Tchefuncta River near Folsom, LA      | 253.3   | 1981-2000 | 13 | 7 |
| 07376000 | Tickfaw River at Holden, LA           | 649.88  | 1981-2000 | 13 | 7 |
| 08013000 | CALCASIEU RIVER NR GLENMORA, LA       | 1300.18 | 1981-2000 | 13 | 7 |
| 08014500 | Whiskey Chitto Creek Near Oberlin, LA | 1325.02 | 1981-2000 | 13 | 7 |
| 08023080 | Bayou Grand Cane near Stanley, LA     | 198.91  | 1981-2000 | 13 | 7 |
| 08025500 | Bayou Toro near Toro, LA              | 382.74  | 1981-2000 | 13 | 7 |
| 08029500 | Big Cow Ck nr Newton, TX              | 384.21  | 1981-2000 | 13 | 7 |
| 08050800 | Timber Ck nr Collinsville, TX         | 109.21  | 1987-2000 | 9  | 5 |
| 08066200 | Long King Ck at Livingston, TX        | 374.87  | 1981-2000 | 13 | 7 |
| 08070000 | E Fk San Jacinto Rv nr Cleveland, TX  | 844.7   | 1981-2000 | 13 | 7 |
| 08070200 | E Fk San Jacinto Rv nr New Caney, TX  | 1005.97 | 1985-2000 | 11 | 5 |
| 08086290 | Big Sandy Ck abv Breckenridge, TX     | 733.37  | 1981-2000 | 13 | 7 |
| 08101000 | Cowhouse Ck at Pidcoke, TX            | 1184.49 | 1981-2000 | 13 | 7 |
| 08103900 | S Fk Rocky Ck nr Briggs, TX           | 86.26   | 1981-2000 | 13 | 7 |
| 08104900 | S Fk San Gabriel Rv at Georgetown, TX | 347.91  | 1981-2000 | 13 | 7 |
| 08109700 | Middle Yegua Ck nr Dime Box, TX       | 621.67  | 1981-2000 | 13 | 7 |
| 08150800 | Beaver Ck nr Mason, TX                | 562.13  | 1981-2000 | 13 | 7 |
| 08155200 | Barton Ck at SH 71 nr Oak Hill, TX    | 241.48  | 1981-2000 | 13 | 7 |
| 08158700 | Onion Ck nr Driftwood, TX             | 321.11  | 1981-2000 | 13 | 7 |
| 08158810 | Bear Ck bl FM 1826 nr Driftwood, TX   | 33.74   | 1981-2000 | 13 | 7 |
| 08164000 | Lavaca Rv nr Edna, TX                 | 2120.71 | 1981-2000 | 13 | 7 |
| 08164300 | Navidad Rv nr Hallettsville, TX       | 865.38  | 1981-2000 | 13 | 7 |
| 08164600 | Garcitas Ck nr Inez, TX               | 264.07  | 1981-2000 | 13 | 7 |
| 08165300 | N Fk Guadalupe Rv nr Hunt, TX         | 439.98  | 1981-2000 | 13 | 7 |
| 08171300 | Blanco Rv nr Kyle, TX                 | 1073.92 | 1981-2000 | 13 | 7 |

|          |                                          |         |           |    |   |
|----------|------------------------------------------|---------|-----------|----|---|
| 08175000 | Sandies Ck nr Westhoff, TX               | 1425.27 | 1981-2000 | 13 | 7 |
| 08176900 | Coletto Ck at Arnold Rd nr Schroeder, TX | 925.53  | 1981-2000 | 13 | 7 |
| 08178880 | Medina Rv at Bandera, TX                 | 851.56  | 1984-2000 | 11 | 6 |
| 08189500 | Mission Rv at Refugio, TX                | 1816.51 | 1981-2000 | 13 | 7 |
| 08190000 | Nueces Rv at Laguna, TX                  | 1923.12 | 1981-2000 | 13 | 7 |
| 08195000 | Frio Rv at Concan, TX                    | 1009.88 | 1981-2000 | 13 | 7 |
| 08196000 | Dry Frio Rv nr Reagan Wells, TX          | 344.48  | 1981-2000 | 13 | 7 |
| 08198500 | Sabinal Rv at Sabinal, TX                | 640.76  | 1981-2000 | 13 | 7 |
| 08200000 | Hondo Ck nr Tarpley, TX                  | 249.16  | 1981-2000 | 13 | 7 |
| 08202700 | Seco Ck at Rowe Ranch nr D'Hanis, TX     | 430.69  | 1981-2000 | 13 | 7 |
| 11098000 | ARROYO SECO NR PASADENA CA               | 46.67   | 1981-2000 | 13 | 7 |
| 11143000 | BIG SUR R NR BIG SUR CA                  | 121.32  | 1981-2000 | 13 | 7 |
| 11148900 | NACIMIENTO R BL SAPAQUE C NR BRYSON CA   | 386.02  | 1981-2000 | 13 | 7 |
| 11162500 | PESCADERO C NR PESCADERO CA              | 119.2   | 1981-2000 | 13 | 7 |
| 11299600 | BLACK C NR COPPEROPOLIS CA               | 41.12   | 1984-2000 | 11 | 6 |
| 11468500 | NOYO R NR FORT BRAGG CA                  | 273.6   | 1981-2000 | 13 | 7 |
| 11481200 | LITTLE R NR TRINIDAD CA                  | 106.84  | 1981-2000 | 13 | 7 |
| 12010000 | NASELLE RIVER NEAR NASELLE, WA           | 142.6   | 1981-2000 | 13 | 7 |
| 12013500 | WILLAPA RIVER NEAR WILLAPA, WA           | 340.7   | 1981-2000 | 13 | 7 |
| 12020000 | CHEHALIS RIVER NEAR DOTY, WA             | 296.74  | 1981-2000 | 13 | 7 |
| 12073500 | HUGE CREEK NEAR WAUNA, WA                | 15.82   | 1981-2000 | 13 | 7 |
| 14166500 | LONG TOM RIVER NEAR NOTI, OREG.          | 238.14  | 1981-2000 | 13 | 7 |
